# Supplementary material
Source: PubMed Central journal article supplement (PMC2287354)

# Suppl. Figure S2

d0 - d20 timepoints in the diurnal cycle  
 (d0 = d24 = EN)  
 Plants from a 12/12 light/dark cycle

p0 - p20 timepoints in the diurnal cycle of /pgm/  
 (p0 = p24 = EN)  
 Plants from a 12/12 light/dark cycle

x0 - x48 extended night for .. hours (x0 = EN)  
 xn\_2 extended night experiment, harvested 2 hours  
 before the end of the nights (EN-2h)  
 Plant from a 14/10 light/dark cycle

4d 4hrs dark  
 4l 4hrs light  
 Both 50 or 350 ppm CO2 (former designated by -CO2)  
 Plants from a 12/12 light/dark cycle

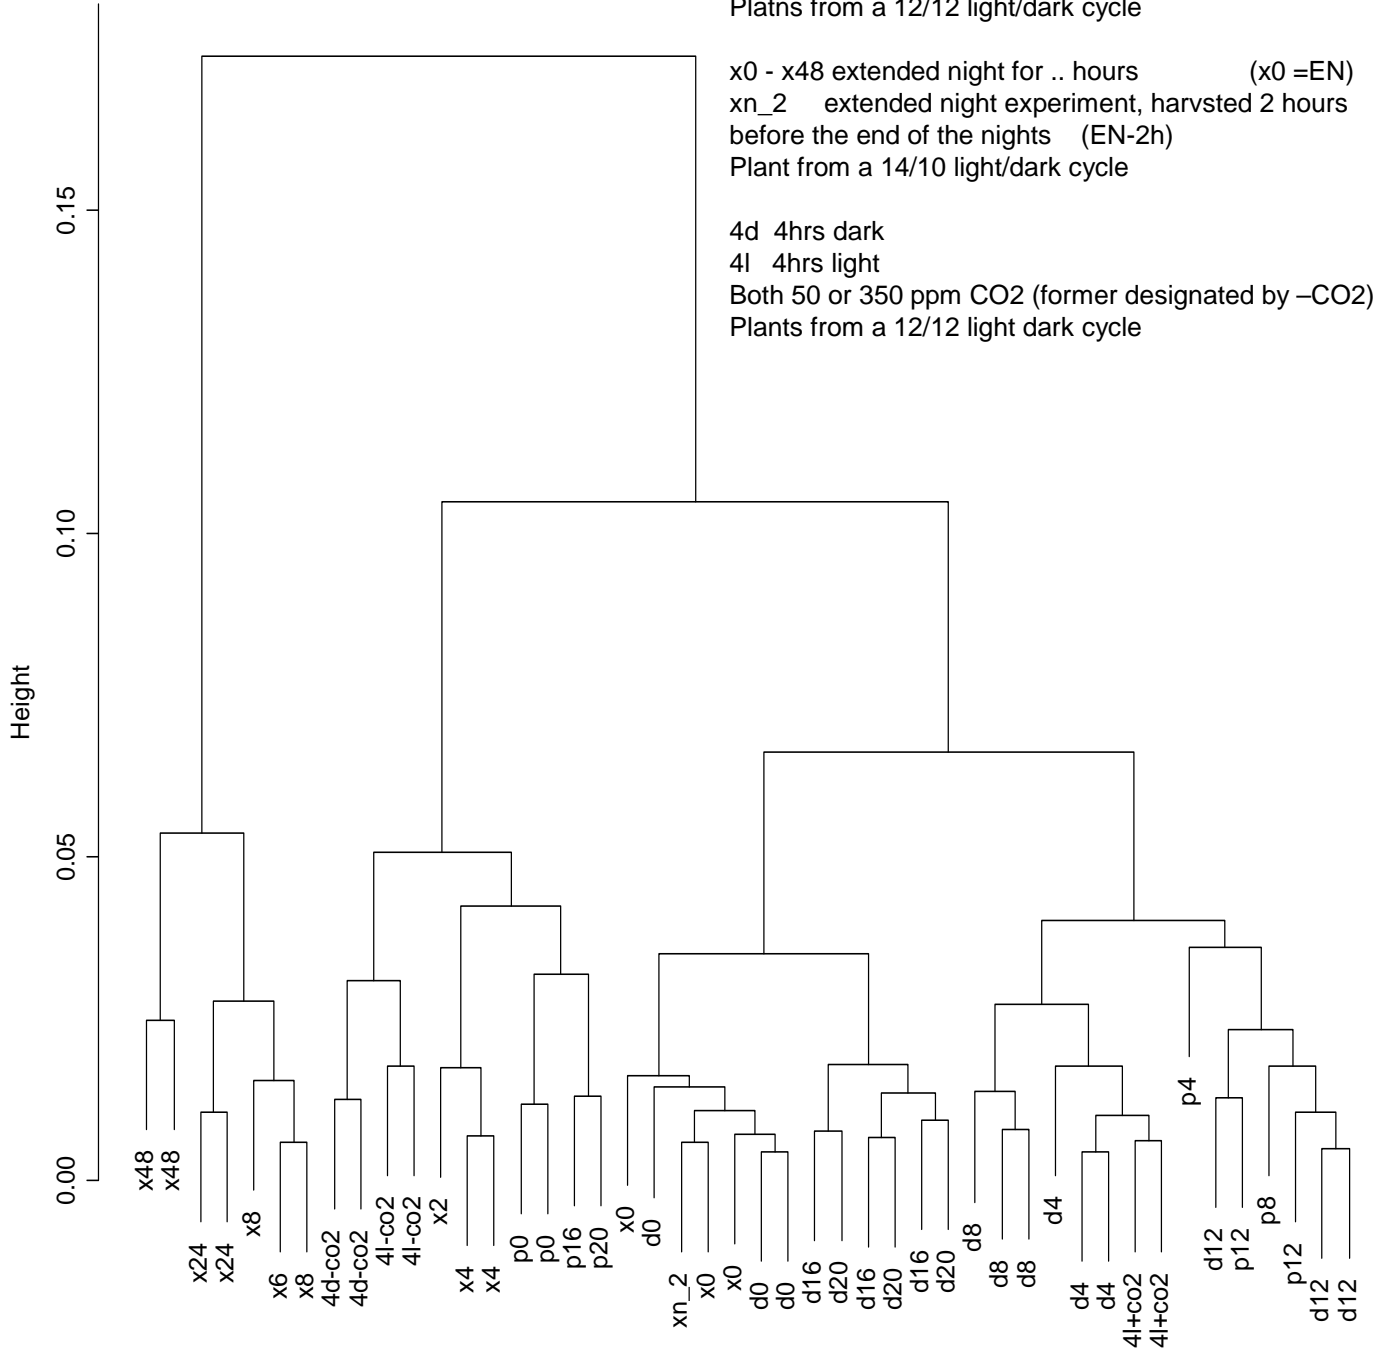

Supplement: plntphys_pp.107.115592_2.pdf [file plntphys_pp.107.115592_2.pdf]
