# Supplementary material
Source: PubMed Central journal article supplement (PMC2287354)

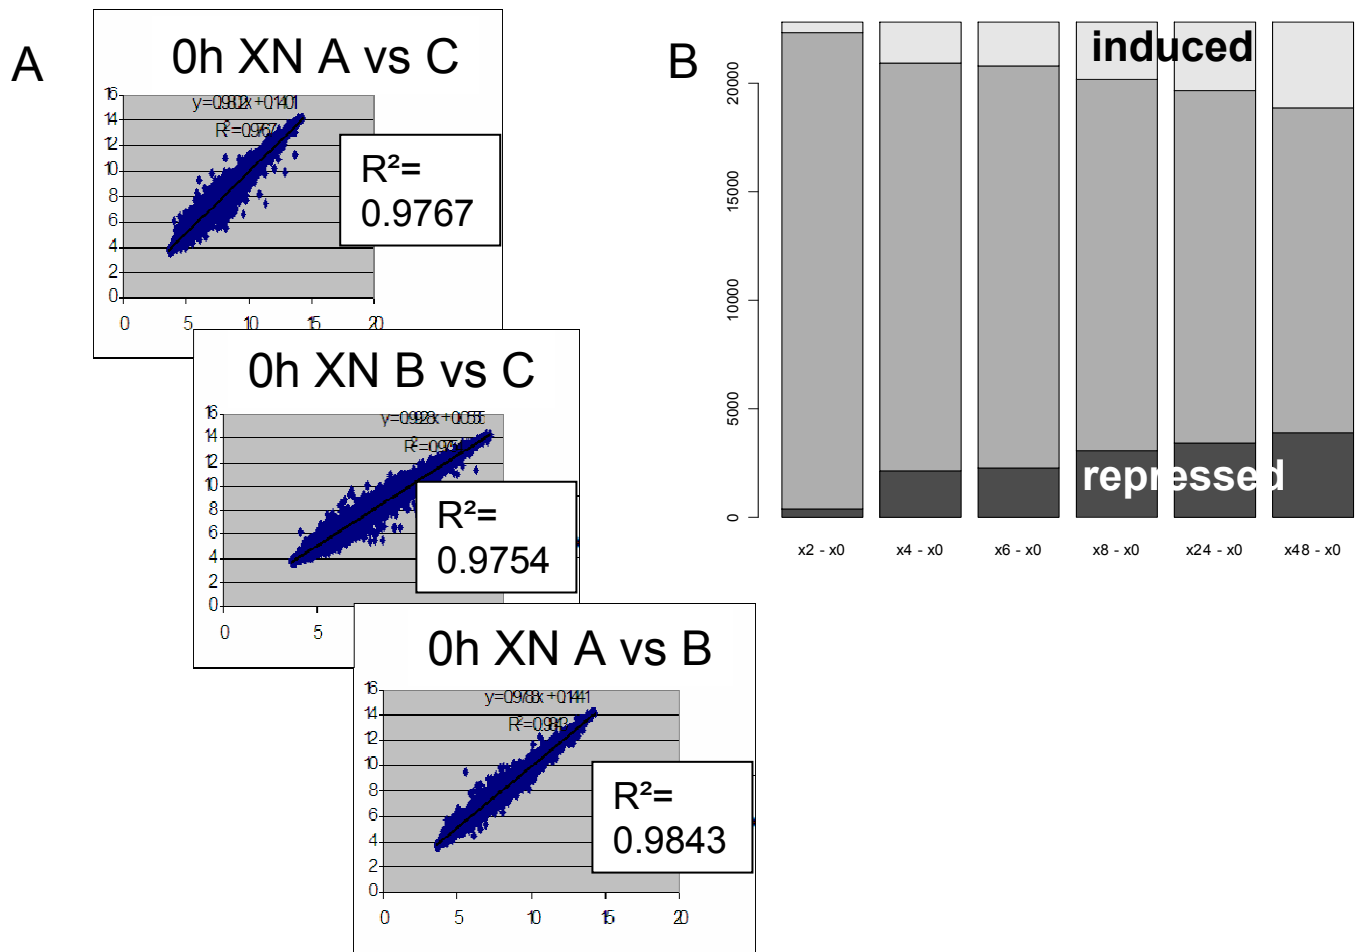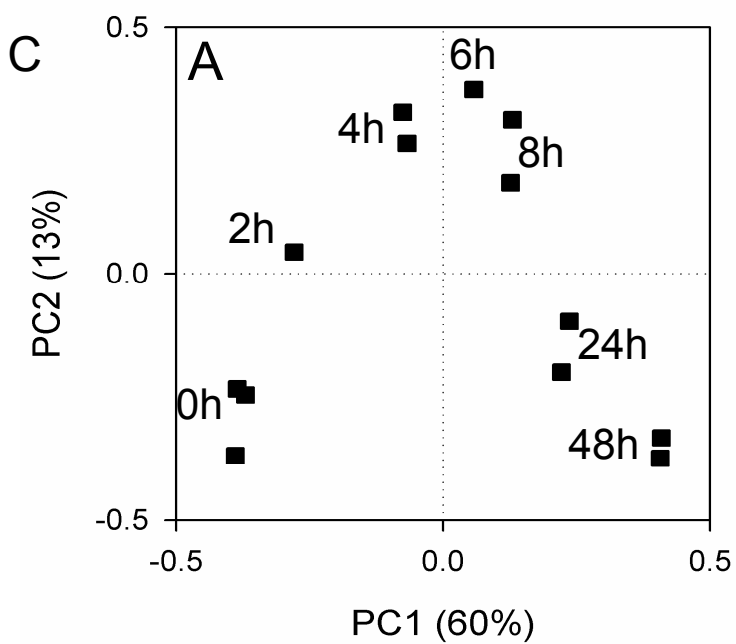

Suppl. Figure S1

Supplement: plntphys_pp.107.115592_1.pdf [file plntphys_pp.107.115592_1.pdf]

Suppl. Figure S3

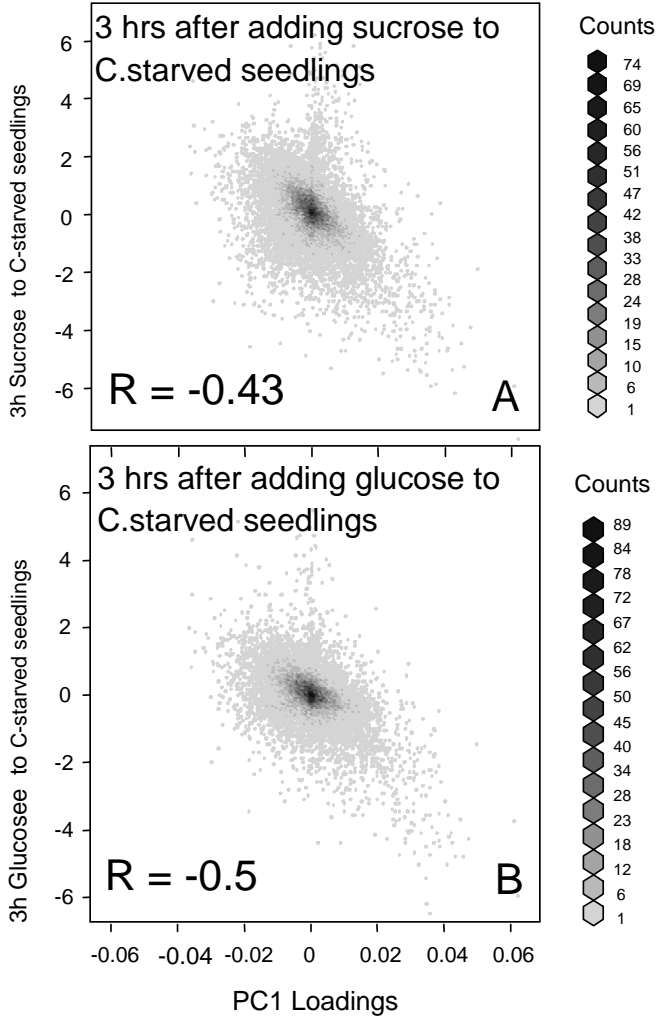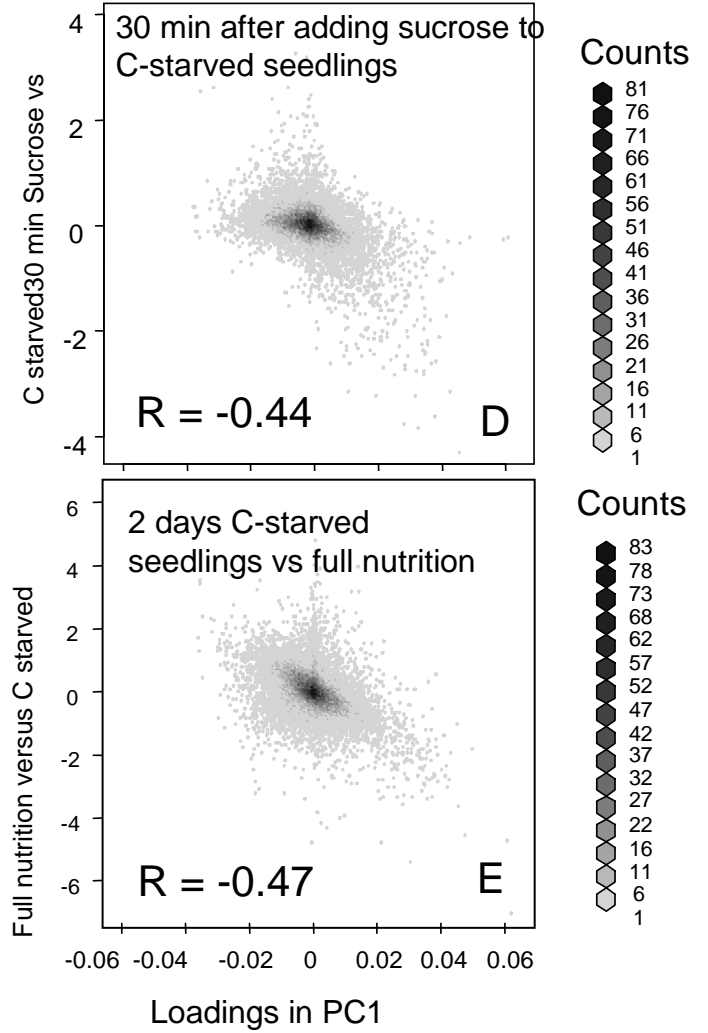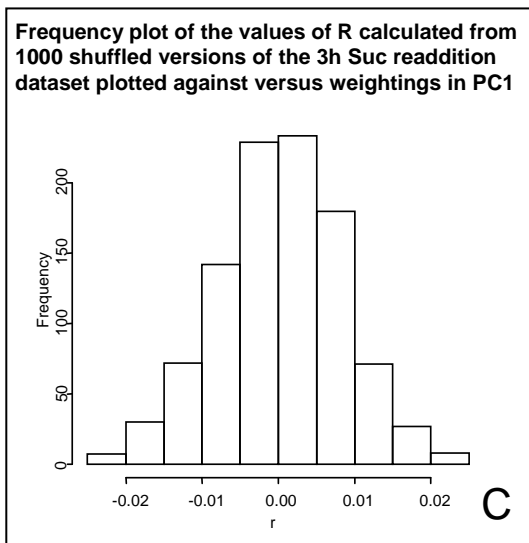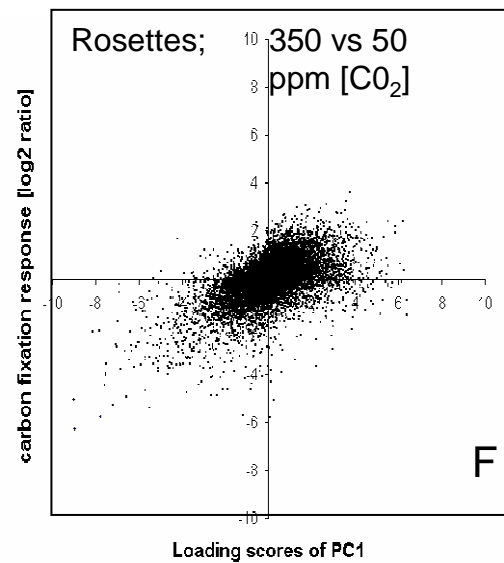

Supplement: plntphys_pp.107.115592_3.pdf [file plntphys_pp.107.115592_3.pdf]

# Suppl. Figure S4B

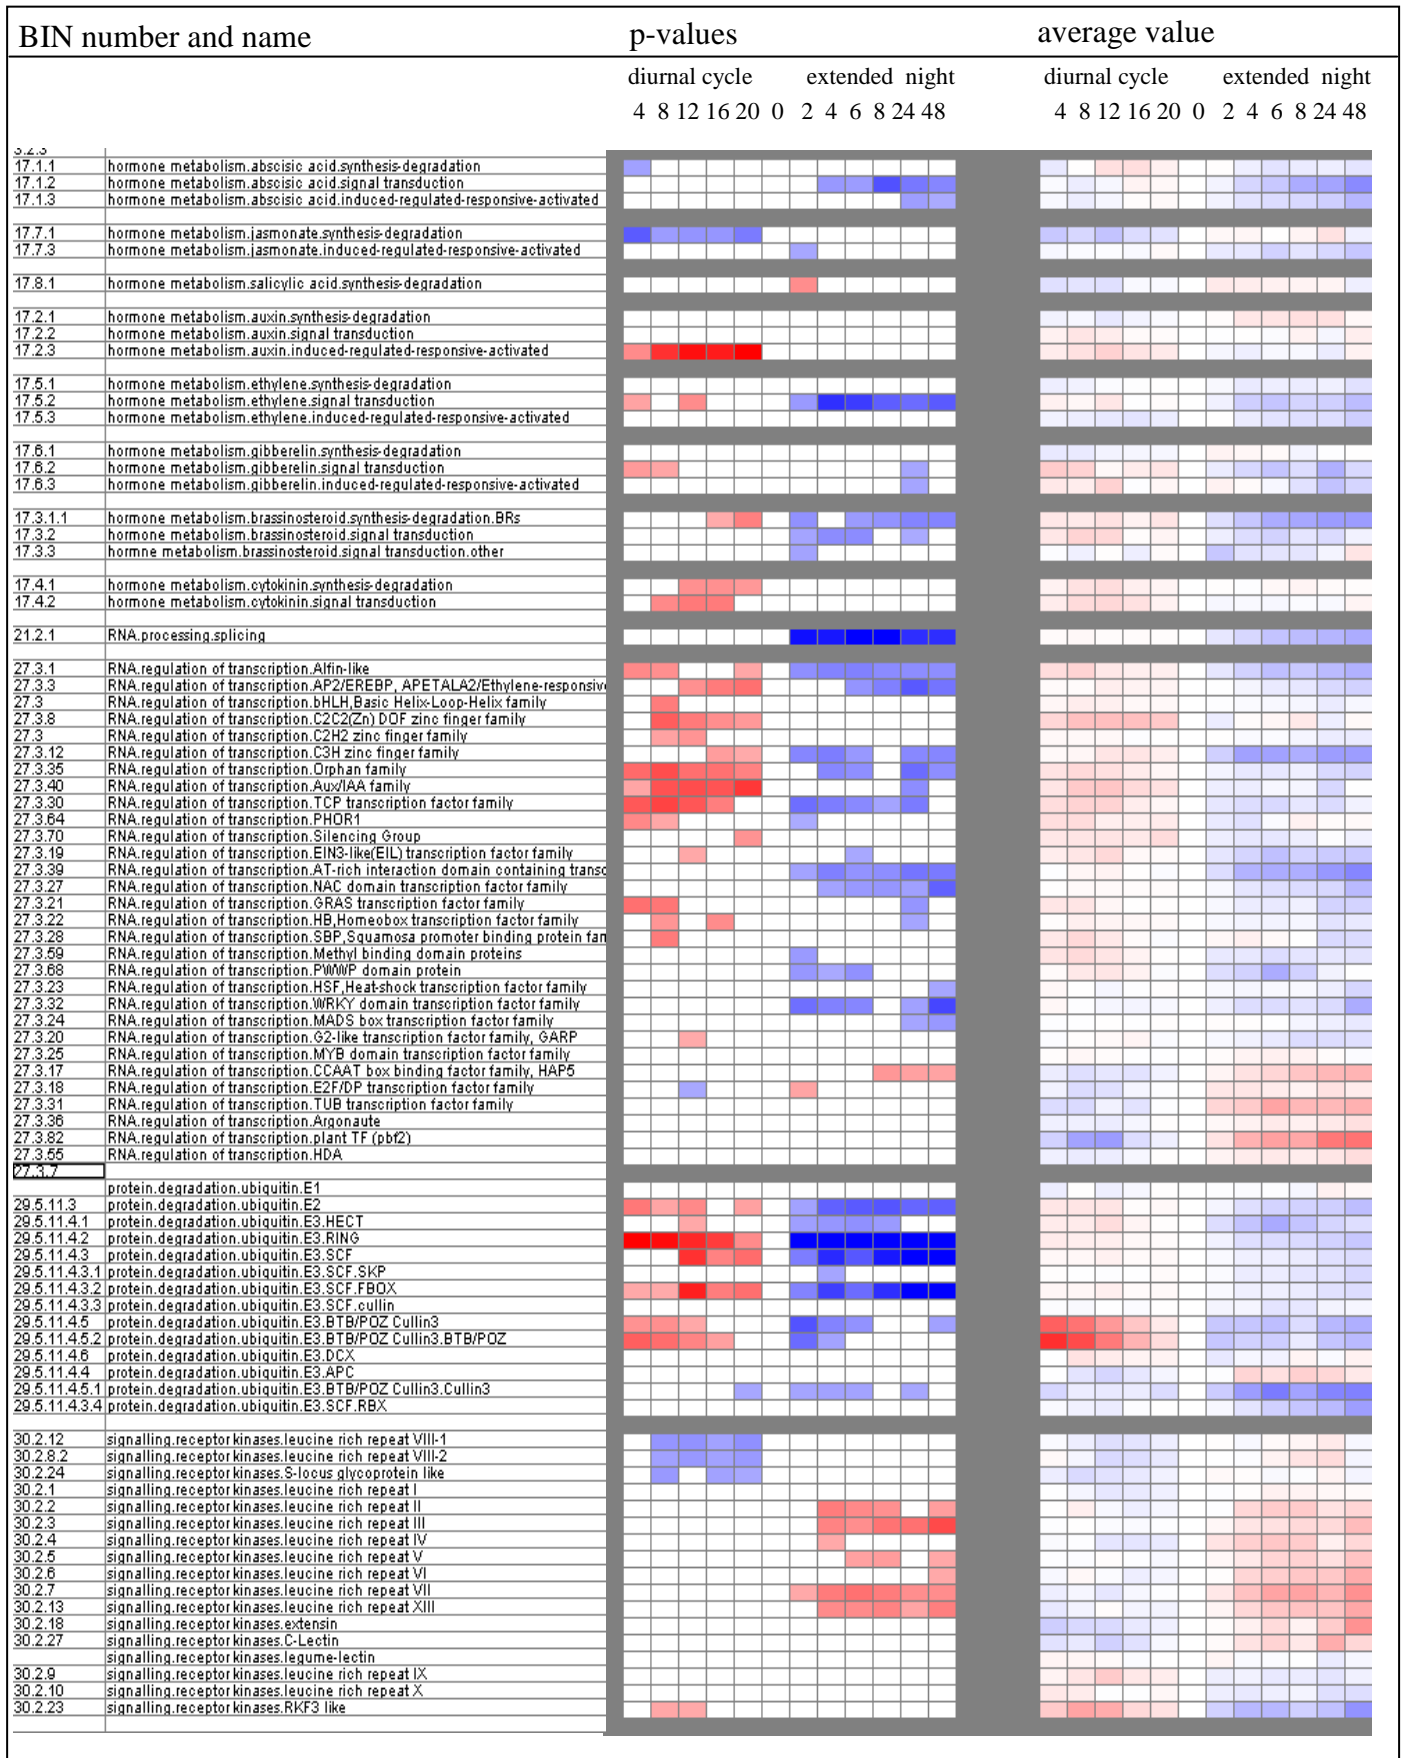

Supplement: plntphys_pp.107.115592_5.pdf [file plntphys_pp.107.115592_5.pdf]

# Down in AKIN10

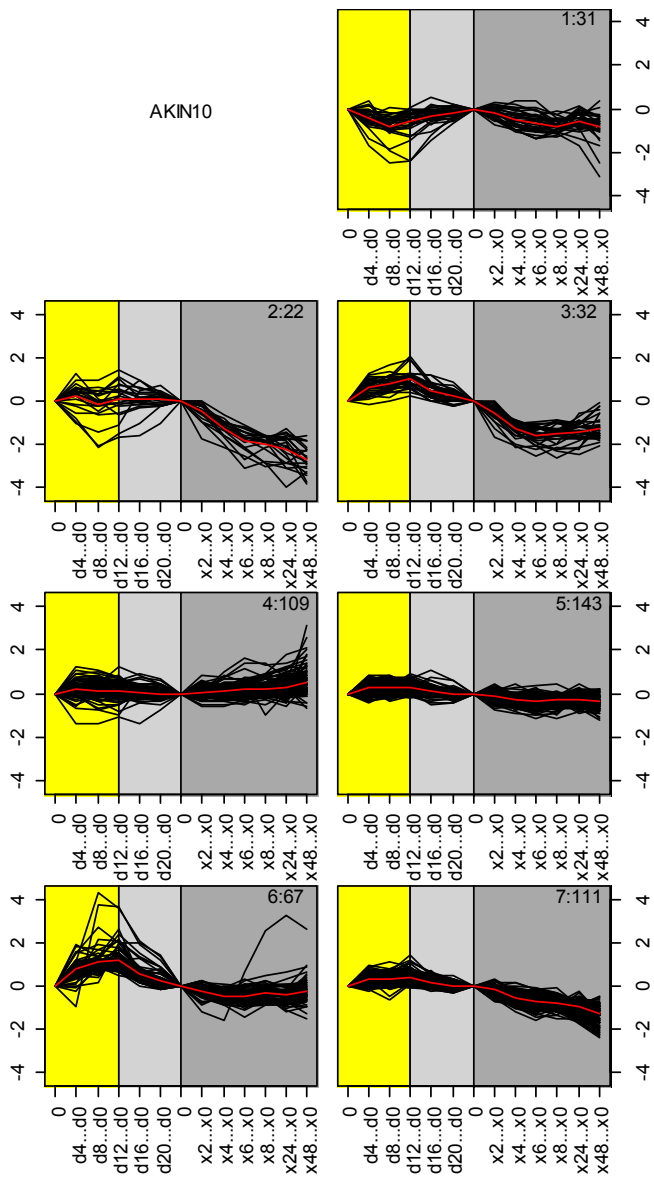

# Up in AKIN10

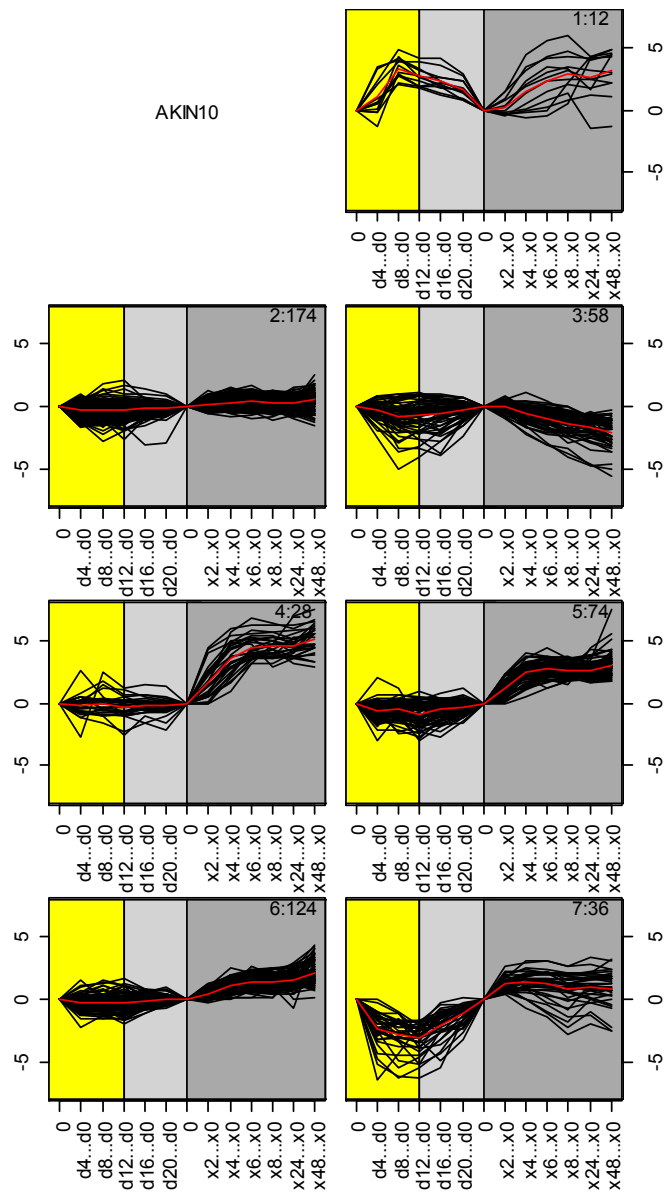

Supplement: plntphys_pp.107.115592_6.pdf [file plntphys_pp.107.115592_6.pdf]
